# Supplementary material for: Functions of mountain pine beetle cytochromes P450 CYP6DJ1, CYP6BW1 and CYP6BW3 in the oxidation of pine monoterpenes and diterpene resin acids
Source: PubMed Central journal article supplement (PMC6508646; doi:10.1371/journal.pone.0216753), 2019-05-09
Supplement: pone.0216753.s003.pdf [file pone.0216753.s003.pdf]

Peak 3

Peak 4

Peak 5

Peak 6

Ion Counts

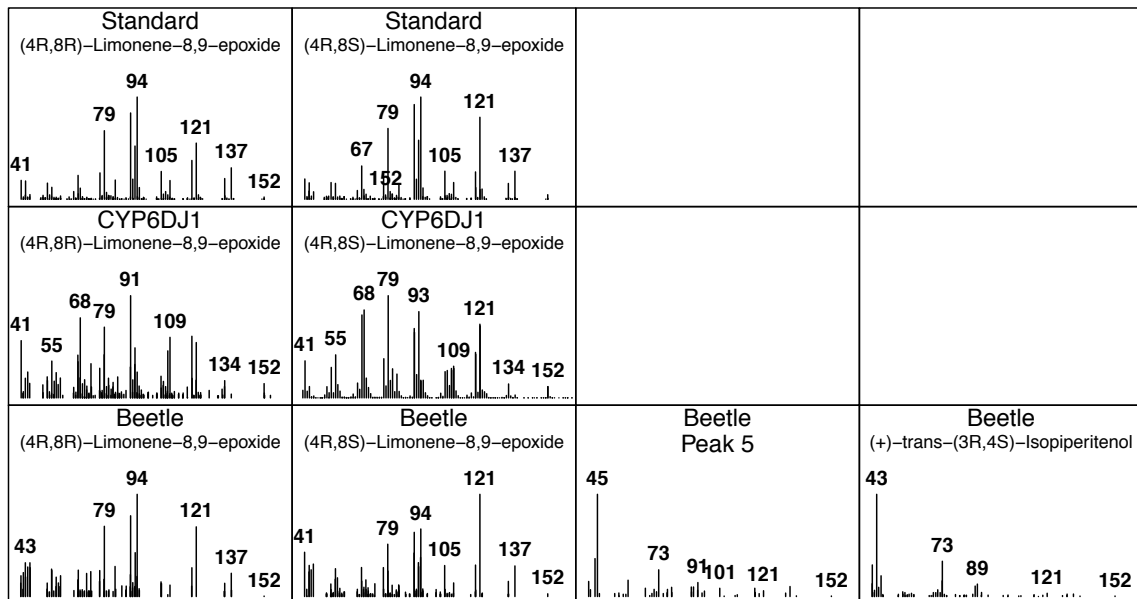

m/z

Peak 7

Peak 8

Peak 9

Ion Counts

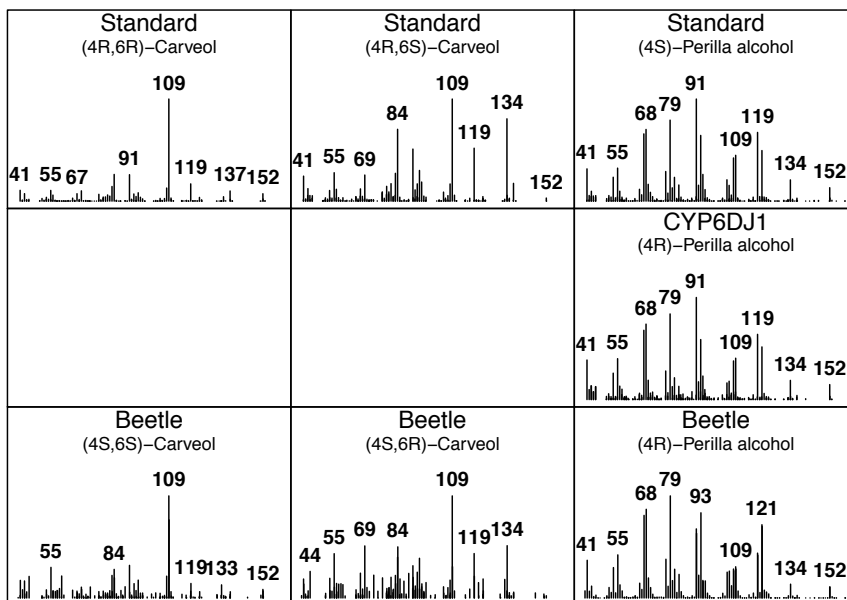

m/z
