# Supplementary material for: Functions of mountain pine beetle cytochromes P450 CYP6DJ1, CYP6BW1 and CYP6BW3 in the oxidation of pine monoterpenes and diterpene resin acids
Source: PubMed Central journal article supplement (PMC6508646; doi:10.1371/journal.pone.0216753), 2019-05-09
Supplement: pone.0216753.s009.pdf [file pone.0216753.s009.pdf]

| Substrate                    | Activity Assay ( <i>in vitro</i> ) |         |         |
|------------------------------|------------------------------------|---------|---------|
|                              | CYP6DJ1                            | CYP6BW1 | CYP6BW3 |
| <b>Monoterpenes</b>          |                                    |         |         |
| (+)- $\alpha$ -pinene        | ✗                                  | ✗       | ✗       |
| (-)- $\alpha$ -pinene        | ✗                                  | ✗       | ✗       |
| (+)- $\beta$ -pinene         | ✗                                  | ✗       | ✗       |
| (-)- $\beta$ -pinene         | ✗                                  | ✗       | ✗       |
| (+)-limonene                 | ✓                                  | ✗       | ✗       |
| (-)-limonene                 | ✓                                  | ✗       | ✗       |
| (+)-3-carene                 | ✗                                  | ✗       | ✗       |
| $\beta$ -phellandrene        | ✗                                  | ✗       | ✗       |
| myrcene                      | ✗                                  | ✗       | ✗       |
| terpinolene                  | ✓                                  | ✗       | ✗       |
| <b>Diterpene Resin Acids</b> |                                    |         |         |
| abietic acid                 | ✗                                  | ✓       | ✓       |
| dehydroabietic acid          | ✗                                  | ✓       | ✓       |
| neoabietic acid              | ✗                                  | ✓       | ✓       |
| levopimaric acid             | ✗                                  | ✓       | ✓       |
| palustric acid               | ✗                                  | ✓       | ✓       |
| isopimaric acid              | ✗                                  | ✓       | ✓       |
