# Supplementary material for: Functions of mountain pine beetle cytochromes P450 CYP6DJ1, CYP6BW1 and CYP6BW3 in the oxidation of pine monoterpenes and diterpene resin acids
Source: PubMed Central journal article supplement (PMC6508646; doi:10.1371/journal.pone.0216753), 2019-05-09
Supplement: pone.0216753.s010.pdf [file pone.0216753.s010.pdf]

| Reference | Retention Index | Compound name                                                                                                              |
|-----------|-----------------|----------------------------------------------------------------------------------------------------------------------------|
| Peak 1    | 1443            | (1 <i>S</i> ,2 <i>R</i> ,4 <i>S</i> )-limonene-1,2-epoxide                                                                 |
| Peak 2    | 1456            | (1 <i>R</i> ,2 <i>S</i> ,4 <i>S</i> )-limonene-1,2-epoxide                                                                 |
| Peak 3    | 1551            | (4 <i>R</i> ,8 <i>R</i> )-limonene-8,9-epoxide<br>(4 <i>S</i> ,8 <i>S</i> )-limonene-8,9-epoxide                           |
| Peak 4    | 1556            | (4 <i>R</i> ,8 <i>S</i> )-limonene-8,9-epoxide<br>(4 <i>S</i> ,8 <i>R</i> )-limonene-8,9-epoxide                           |
| Peak 5    | 1662            | Unknown limonene product                                                                                                   |
| Peak 6    | 1754            | (+)- <i>trans</i> -(3 <i>R</i> ,4 <i>S</i> )-isopiperitenol<br>(-)- <i>trans</i> -(3 <i>S</i> ,4 <i>R</i> )-isopiperitenol |
| Peak 7    | 1832            | (+)- <i>cis</i> -(4 <i>S</i> ,6 <i>S</i> )-carveol<br>(-)- <i>cis</i> -(4 <i>R</i> ,6 <i>R</i> )-carveol                   |
| Peak 8    | 1863            | (+)- <i>trans</i> -(4 <i>S</i> ,6 <i>R</i> )-carveol<br>(-)- <i>trans</i> -(4 <i>R</i> ,6 <i>S</i> )-carveol               |
| Peak 9    | 2008            | (4 <i>R</i> )-perilla alcohol<br>(4 <i>S</i> )-perilla alcohol                                                             |
| Peak 10   | 2165            | (4 <i>S</i> )-limonene-1,2-diol                                                                                            |
| Peak 11   | 1773            | Unknown terpinolene product                                                                                                |
| Peak 12   | 2032            | Unknown terpinolene product                                                                                                |
| Peak 13   | 2040            | Unknown terpinolene product                                                                                                |
| Peak 14   | 2094            | Unknown terpinolene product                                                                                                |
