# Supplementary material for: Functions of mountain pine beetle cytochromes P450 CYP6DJ1, CYP6BW1 and CYP6BW3 in the oxidation of pine monoterpenes and diterpene resin acids
Source: PubMed Central journal article supplement (PMC6508646; doi:10.1371/journal.pone.0216753), 2019-05-09
Supplement: pone.0216753.s011.pdf [file pone.0216753.s011.pdf]

| <b>Reference</b> | <b>Retention Index</b> | <b>Compound name</b>           |
|------------------|------------------------|--------------------------------|
| Peak 15          | 2655                   | epoxy-isopimaric product       |
| Peak 16          | 2892                   | hydroxy-isopimaric product     |
| Peak 17          | 2675                   | hydroxy-palustric product      |
| Peak 18          | 2690                   | hydroxy-dehydroabietic product |
| Peak 19          | 2713                   | hydroxy-levopimaric product    |
| Peak 20          | 2729                   | hydroxy-abietic product        |
| Peak 21          | 2872                   | hydroxy-neoabietic product     |
